# Supplementary material for: Cholesterol Metabolic Profiling of HDL in Women with Late-Onset Preeclampsia
Source: MDPI journal article supplement (doi:10.3390/ijms241411357), 2023-07-12
Supplement: s1 [file s1]

**Table S1.** Changes in lipid profile parameters in RG and PG in the 1<sup>st</sup> and 2<sup>nd</sup> trimester

|                                      | 1 <sup>st</sup> trimester |                            | 2 <sup>nd</sup> trimester |                                   | p <sup>1</sup> | p <sup>2</sup> |
|--------------------------------------|---------------------------|----------------------------|---------------------------|-----------------------------------|----------------|----------------|
|                                      | RG<br>(N=70)              | PG<br>(N=20)               | RG<br>(N=70)              | PG<br>(N=20)                      |                |                |
| WG                                   | 12.8 ± 0.80               | 12.7 ± 0.16                | 23.3 ± 0.83               | 23.4 ± 0.99                       |                |                |
| Age, years                           | 32.0 ± 5.56               | 33.1 ± 4.26                |                           |                                   |                |                |
| MAP, mmHg                            | 85.9 ± 11.59              | 92.4 ± 9.01 <sup>dg</sup>  | 82.5 ± 11.51              | 89.8 ± 9.64 <sup>dg</sup>         | <0.05          | 0.164          |
| BMI <sup>b</sup> , kg/m <sup>2</sup> | 23.6<br>(21.1-27.5)       | 27.5<br>(24.2-31.1)        | 25.4<br>(23.6-30.0)       | 28.4 <sup>eg</sup><br>(26.4-32.7) | <0.001         | <0.001         |
| Weight gain <sup>b</sup> , kg        | 2.15<br>(1.27-4.07)       | 3.00<br>(0.25-4.40)        | 5.40<br>(3.72-7.02)       | 4.70<br>(2.82-6.75)               | <0.001         | <0.05          |
| Weight gain <sup>b</sup> , %         | 4.00<br>(2.00-6.00)       | 4.00<br>(2.25-5.90)        | 7.00<br>(5.00-9.75)       | 5.50<br>(4.00-8.75)               | <0.001         | <0.05          |
| TC, mmol/L                           | 5.33 ± 1.070              | 5.46 ± 0.762 <sup>dg</sup> | 6.81 ± 1.365              | 6.61 ± 1.236                      | <0.001         | <0.001         |
| HDL-C, mmol/L                        | 1.77 ± 0.336              | 1.90 ± 0.587               | 2.11 ± 0.386              | 1.88 ± 0.363 <sup>dg</sup>        | <0.001         | 0.885          |
| LDL-C, mmol/L                        | 2.94 ± 0.849              | 2.81 ± 0.633               | 3.81 ± 1.148              | 3.61 ± 1.104                      | <0.001         | <0.001         |
| TG <sup>a</sup> , mmol/L             | 1.27<br>(1.18-1.38)       | 1.53<br>(1.27-1.85)        | 1.86<br>(1.73-2.00)       | 2.33 <sup>dg</sup><br>(2.00-2.71) | <0.001         | <0.001         |

RG – risk group; PG – preeclampsia group; WG – week of gestation; BMI – body mass index; MAP – mean arterial pressure; TC – total cholesterol; HDL-C – high density lipoprotein cholesterol; LDL-C – low density lipoprotein cholesterol; TG – triglycerides

Data are shown as mean ± standard deviation; <sup>a</sup> geometric mean (95<sup>th</sup> CI); <sup>b</sup> median (interquartile range)

p<sup>1</sup> – Paired-Samples T-Test for risk group; p<sup>2</sup> –for preeclampsia group

p<sup>1c</sup> – Wilcoxon Test for risk group; p<sup>2c</sup> –for preeclampsia group

Difference significantly different from the risk group: <sup>d</sup> Analysis of covariance (ANCOVA); <sup>e</sup> Non-parametric ANCOVA (Quade method)

<sup>f</sup> p<0.001; <sup>g</sup> p<0.05
